# Supplementary material for: Efficient and stable planar heterojunction perovskite solar cells with an MoO3/PEDOT:PSS hole transporting layer
Source: Royal Society of Chemistry journal article supplement (doi:10.1039/c5nr01864a), 2015-01-01
Supplement: c5nr01864a1.pdf [file c5nr01864a1.pdf]

## Supplementary Information

### **Efficient and stable planar heterojunction perovskite solar cells with a MoO<sub>3</sub>/PEDOT:PSS hole transporting layer**

Fuhua Hou,<sup>a,b</sup> Zisheng Su,<sup>\*a</sup> Fangming Jin,<sup>a,b</sup> Xingwu Yan,<sup>a,b</sup> Lidan Wang,<sup>\*c</sup> Haifeng

Zhao,<sup>a</sup> Jianzhuo Zhu,<sup>d</sup> Bei Chu<sup>\*a</sup> and Wenlian Li<sup>a</sup>

<sup>a</sup> State Key Laboratory of Luminescence and Applications, Changchun Institute of Optics, Fine Mechanics and Physics, Chinese Academy of Sciences, Changchun 130033, P. R. China

<sup>b</sup> University of Chinese Academy of Sciences, Beijing 100039, P. R. China

<sup>c</sup> State Key Laboratory of Electroanalytic Chemistry, Changchun Institute of Applied Chemistry, Chinese Academy of Sciences, Changchun 130022, P. R. China

<sup>d</sup> College of Science, Yanshan University, Qinhuangdao 066004, P. R. China.

Corresponding authors:

*\* Zisheng Su: Electronic mail: suzs@ciomp.ac.cn*

*Lidan Wang: Electronic mail: wangld@ciac.ac.cn*

*Bei Chu: Electronic mail: chub@ciomp.ac.cn*

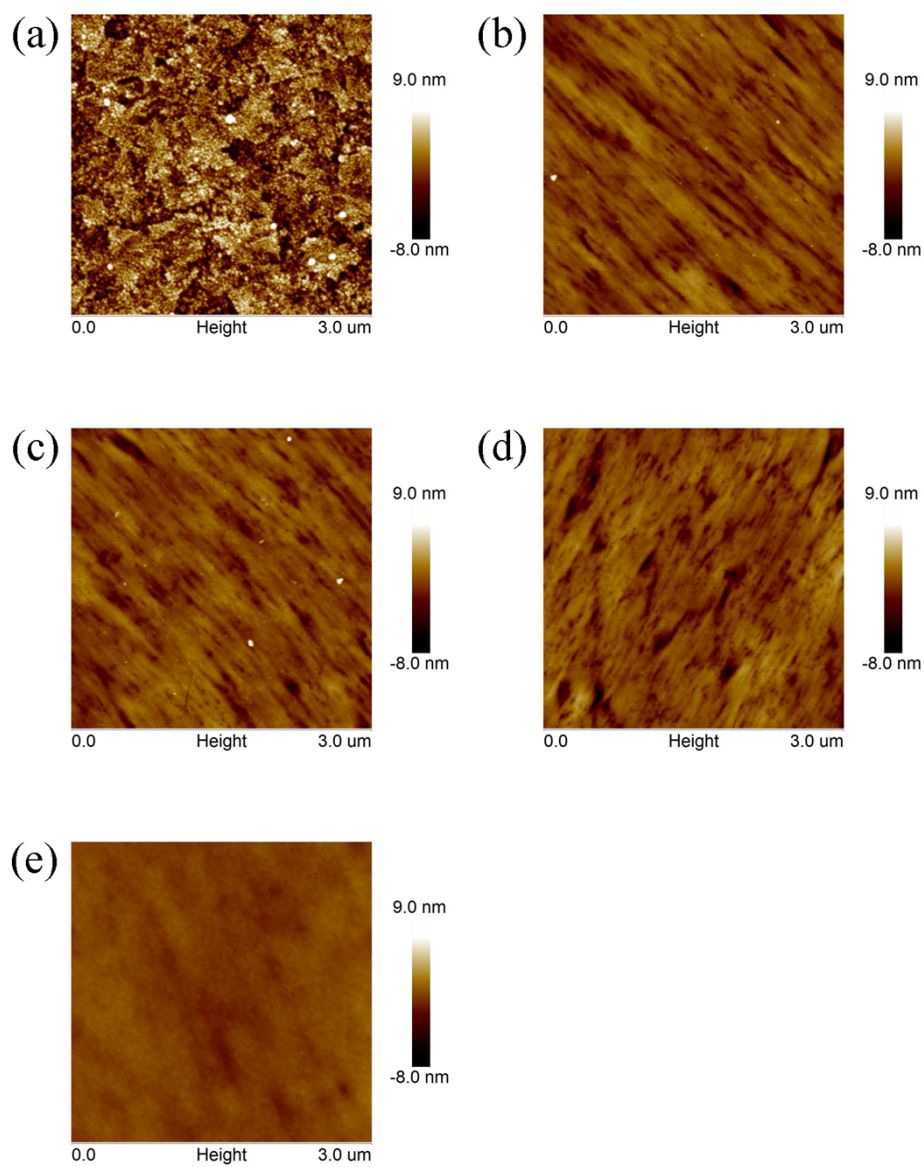

Figure S1. AFM images of (a) bare ITO and  $\text{MoO}_3$  films prepared from (b) 0.2 wt%, (c) 0.5 wt%, (d) 1.0 wt%, and (e) 2.0 wt%  $\text{MoO}_3$  solutions on ITO substrates.

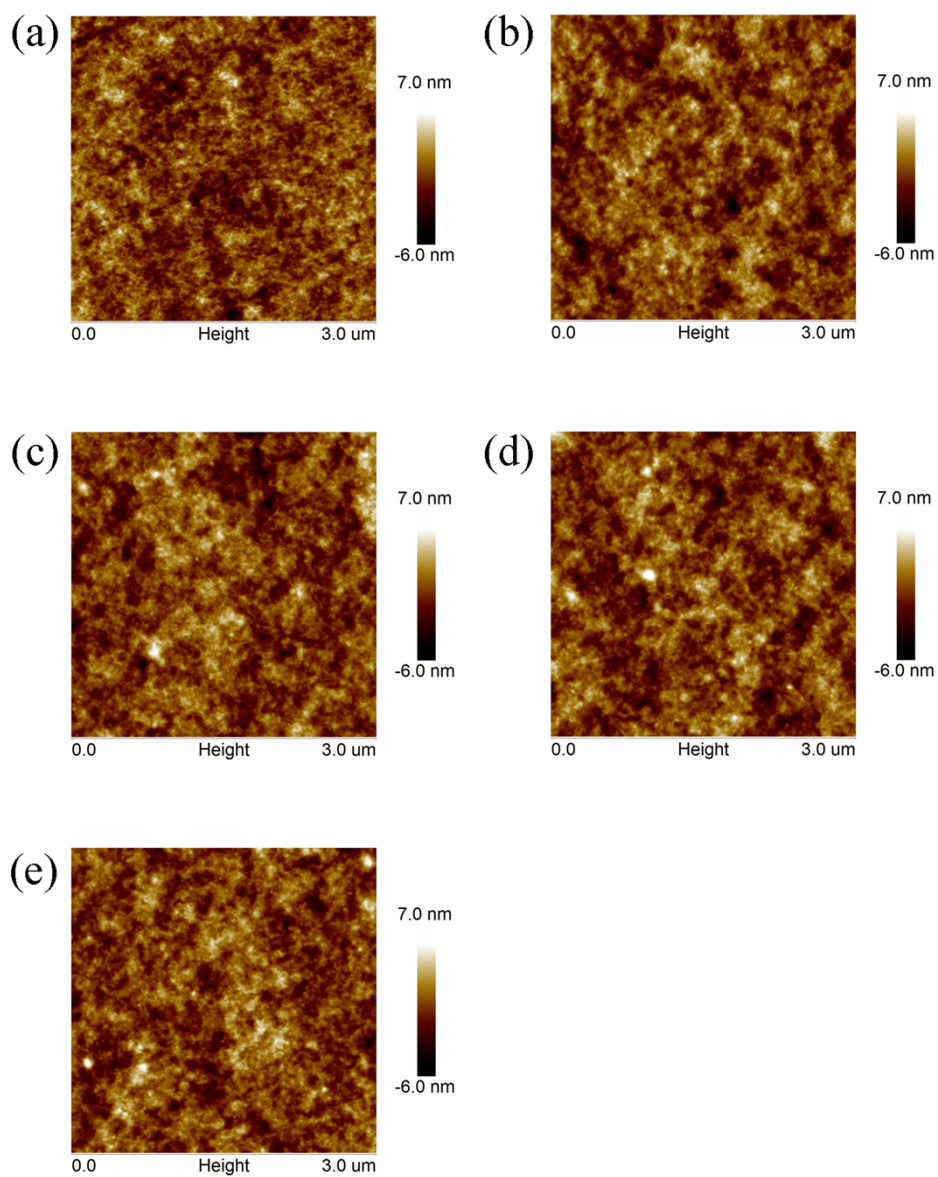

Figure S2. AFM images of PEDOT:PSS films on (a) ITO and MoO<sub>3</sub> layers prepared from (a) 0.2 wt%, (c) 0.5 wt%, (d) 1.0 wt%, and (e) 2.0 wt% MoO<sub>3</sub> solutions.

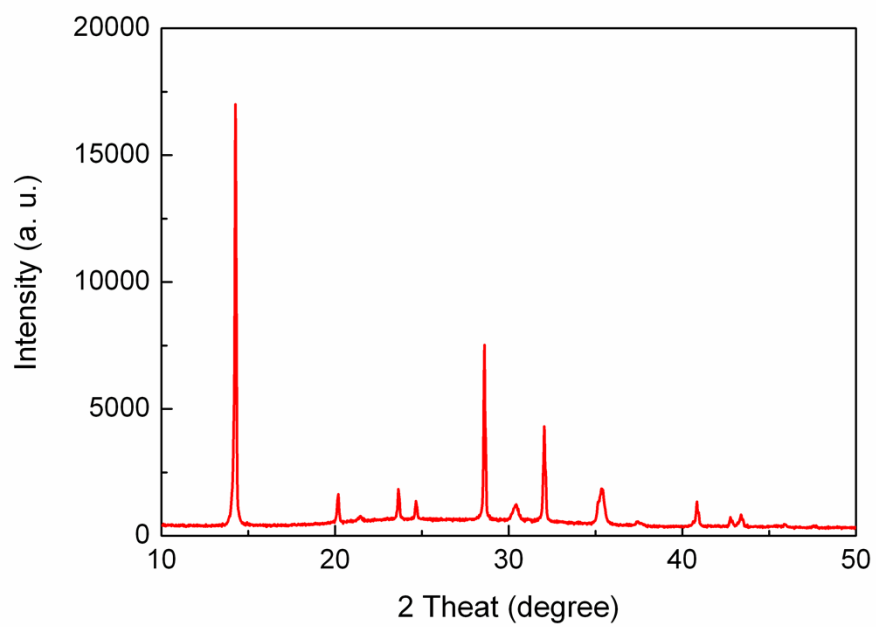

Figure S3. XRD pattern of  $\text{CH}_3\text{NH}_3\text{PbI}_3$  on a  $\text{MoO}_3/\text{PEDOT:PSS}$  substrate.

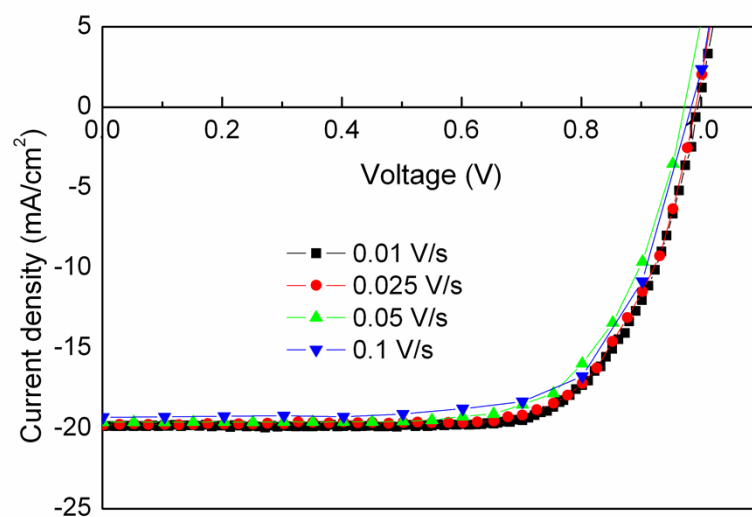

Figure S4.  $J$ - $V$  curves measured with different scanning rates of one of the devices fabricated with 1.0 wt% MoO<sub>3</sub>.

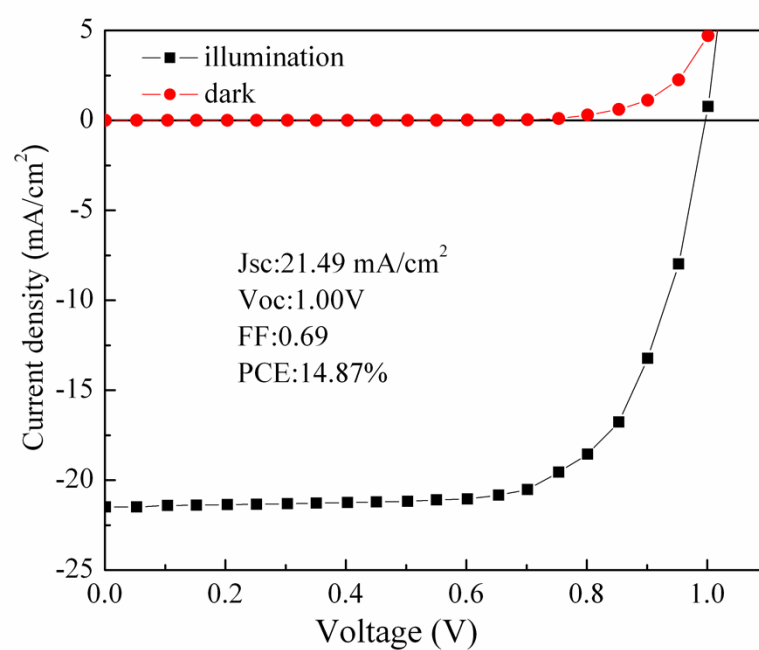

Figure S5.  $J$ - $V$  curves of the optimized device with a  $\text{MoO}_3$ /PEDOT:PSS HTL under illumination and in dark after storage in ambient conditions in dark for 72 h.
